# Supplementary material for: Detection of IgA and IgG Antibodies against the Structural Proteins of SARS-CoV-2 in Breast Milk and Serum Samples Derived from Breastfeeding Mothers
Source: MDPI journal article supplement (doi:10.3390/v15040966), 2023-04-14
Supplement: s1 [file s1]

**Table S1. COVID-19 natural infection and vaccination in breastfeeding women.**

| <b>Variables</b>                     | <b>n (%)</b>    |
|--------------------------------------|-----------------|
| <b>COVID-19</b>                      |                 |
| No                                   | 13 (43.3)       |
| Yes                                  | 17 (56.7)       |
| <b>Type of diagnostic</b>            |                 |
| None                                 | 13 (43.3)       |
| RT-PCR                               | 4 (13.3)        |
| Antigen test                         | 5 (16.7)        |
| Clinical/Unknown                     | 8 (26.6)        |
| <b>Time since diagnosis</b>          |                 |
| <6 meses                             | 16 (54)         |
| ≥6 meses                             | 14 (46)         |
| <b>Vaccination</b>                   |                 |
| No                                   | 3 (10)          |
| Yes                                  | 27 (90)         |
| <b>Number of doses</b>               |                 |
| None                                 | 3 (10)          |
| 1-2                                  | 20 (67)         |
| >3                                   | 7 (23)          |
| <b>Primary vaccination</b>           |                 |
| None                                 | 3 (10)          |
| AstraZeneca                          | 7 (23.3)        |
| Cansino                              | 2 (6.7)         |
| Pfizer                               | 10 (33.3)       |
| Sinovac                              | 7 (23.3)        |
| Other                                | 1 (3.3)         |
| <b>Booster Vaccination</b>           |                 |
| None                                 | 3 (10)          |
| Homologous                           | 14 (46.7)       |
| Heterologous                         | 13 (43.3)       |
| <b>Elapsed time since last boost</b> |                 |
| None                                 | 3 (10)          |
| <6 months                            | 7 (23.3)        |
| ≥6 months                            | 20 (66.7)       |
| <b>Total</b>                         | <b>30 (100)</b> |
